# Supplementary material for: Evidence for linkage of pfmdr1, pfcrt, and pfk13 polymorphisms to lumefantrine and mefloquine susceptibilities in a Plasmodium falciparum cross
Source: PubMed Central journal article supplement — Int J Parasitol Drugs Drug Resist. 2020 Oct 27;14:208–17. doi: 10.1016/j.ijpddr.2020.10.009 (PMC7677662; doi:10.1016/j.ijpddr.2020.10.009), 2020-10-27
Supplement: mmc1.pdf [file mmc1.pdf]

**Table S1.** Mean EC<sub>50</sub> values (nanomolar) with 95% confidence intervals (CIs) for lumefantrine (LUM), halofantrine (HLF), mefloquine (MEF), and chloroquine (CQ). Color represents presence of the 803 (green) or GB4 (yellow) *pfmdr1* allele.

| Clone | LUM              |              |   | HLF              |              |   | MEF              |              |   | CQ               |                |   |
|-------|------------------|--------------|---|------------------|--------------|---|------------------|--------------|---|------------------|----------------|---|
|       | EC <sub>50</sub> | 95% CI       | n | EC <sub>50</sub> | 95% CI       | n | EC <sub>50</sub> | 95% CI       | n | EC <sub>50</sub> | 95% CI         | n |
| 803   | 3.21             | 2.80 -- 3.66 | 6 | 1.48             | 1.35 -- 1.61 | 4 | 31.67            | 29.0 -- 34.6 | 7 | 147.9            | 143.7 -- 152.3 | 5 |
| GB4   | 0.55             | 0.46 -- 0.67 | 5 | 0.32             | 0.29 -- 0.35 | 7 | 10.84            | 10.5 -- 11.2 | 6 | 74.0             | 68.2 -- 80.3   | 3 |
| 11C2  | 0.78             | 0.67 -- 0.91 | 3 | 0.83             | 0.53 -- 1.28 | 3 | 7.99             | 6.4 -- 10.0  | 3 | 67.9             | 61.2 -- 75.4   | 3 |
| 24G11 | 1.49             | 1.36 -- 1.64 | 3 | 2.38             | 2.09 -- 2.61 | 3 | 8.85             | 8.1 -- 9.6   | 3 | 152.8            | 151.5 -- 154.1 | 3 |
| 36D5  | 1.83             | 1.73 -- 1.93 | 4 | 1.52             | 1.42 -- 1.64 | 3 | 22.95            | 20.6 -- 25.7 | 4 | 132.3            | 127.8 -- 137.0 | 3 |
| 36E5  | 2.94             | 2.54 -- 3.39 | 4 | 2.11             | 1.94 -- 2.29 | 4 | 31.11            | 25.4 -- 39.0 | 5 | 92.0             | 88.2 -- 96.1   | 3 |
| 36F11 | 0.76             | 0.68 -- 0.85 | 3 | 1.48             | 1.34 -- 1.63 | 3 | 7.82             | 6.4 -- 9.5   | 3 | 89.3             | 86.7 -- 92.0   | 3 |
| 36H9  | 1.51             | 1.15 -- 1.89 | 4 | 0.41             | 0.34 -- 0.48 | 3 | 18.25            | 7.6 -- 34.0  | 3 | 50.0             | 45.5 -- 55.0   | 3 |
| 37D9  | 1.13             | 0.93 -- 1.36 | 3 | 0.68             | 0.61 -- 0.75 | 3 | 14.94            | 10.9 -- 20.7 | 4 | 112.2            | 108.5 -- 116.0 | 3 |
| 38G5  | 2.69             | 2.35 -- 3.09 | 3 | 2.64             | 2.55 -- 2.74 | 3 | 28.72            | 24.8 -- 33.4 | 3 | 99.1             | 96.1 -- 102.2  | 3 |
| 39C3  | 0.76             | 0.67 -- 0.85 | 3 | 0.49             | 0.45 -- 0.54 | 3 | 7.76             | 6.0 -- 10.1  | 3 | 47.1             | 44.6 -- 49.7   | 3 |
| 39C5  | 4.19             | 3.80 -- 4.64 | 3 | 3.78             | 2.99 -- 4.85 | 3 | 29.89            | 28.9 -- 30.9 | 3 | 60.0             | 44.5 -- 80.7   | 3 |
| 39H5  | 2.73             | 2.37 -- 3.15 | 3 | 0.95             | 0.86 -- 1.04 | 4 | 21.91            | 19.3 -- 24.9 | 5 | 52.8             | 40.3 -- 69.2   | 4 |
| 40E7  | 3.07             | 2.39 -- 3.99 | 4 | 1.99             | 1.80 -- 2.21 | 3 | 33.88            | 26.1 -- 45.6 | 4 | 93.3             | 84.6 -- 102.8  | 4 |
| 43A6  | 0.76             | 0.67 -- 0.85 | 4 | 0.53             | 0.48 -- 0.58 | 3 | 9.03             | 7.6 -- 10.7  | 4 | 133.3            | 115.6 -- 153.6 | 3 |
| 43E5  | 3.30             | 3.05 -- 3.57 | 4 | 3.10             | 2.86 -- 3.38 | 3 | 41.13            | 35.6 -- 47.7 | 4 | 42.2             | 36.9 -- 48.1   | 3 |
| 44D4  | 1.24             | 1.19 -- 1.29 | 4 | 1.03             | 0.91 -- 1.15 | 4 | 8.90             | 6.8 -- 11.7  | 5 | 111.4            | 108.8 -- 114.0 | 4 |
| 44F6  | 0.82             | 0.71 -- 0.94 | 3 | 0.59             | 0.54 -- 0.64 | 3 | 11.05            | 9.0 -- 13.6  | 5 | 62.2             | 60.7 -- 63.8   | 4 |
| 46G9  | 0.76             | 0.70 -- 0.82 | 4 | 0.42             | 0.40 -- 0.46 | 3 | 10.44            | 8.5 -- 12.8  | 4 | 70.5             | 68.4 -- 72.7   | 3 |
| 48C1  | 0.69             | 0.60 -- 0.80 | 4 | 0.32             | 0.29 -- 0.35 | 5 | 9.31             | 5.7 -- 14.5  | 5 | 88.8             | 87.0 -- 90.6   | 3 |
| 61D3  | 0.97             | 0.87 -- 1.08 | 4 | 1.96             | 1.75 -- 2.19 | 3 | 11.23            | 8.4 -- 14.9  | 4 | 49.5             | 47.2 -- 51.8   | 4 |
| 76H10 | 0.97             | 0.88 -- 1.07 | 3 | 0.87             | 0.79 -- 0.96 | 3 | 10.83            | 9.0 -- 13.0  | 3 | 147.1            | 137.2 -- 157.7 | 3 |
| 85G7  | 5.21             | 4.72 -- 5.77 | 4 | 3.30             | 2.84 -- 3.60 | 4 | 47.08            | 39.3 -- 57.4 | 4 | 78.2             | 72.3 -- 84.6   | 3 |
| 87E7  | 2.79             | 2.49 -- 3.13 | 3 | 1.38             | 0.99 -- 2.04 | 3 | 19.64            | 16.6 -- 23.4 | 3 | 69.7             | 60.3 -- 80.7   | 3 |

**Table S2.** Mean DTR values (days) and 95% confidence intervals from lumefantrine (LUM) assays of the 803×GB4 parasites. Color indicates inheritance of the 803 (green) or GB4 (yellow) *pfmdr1* allele.

| Clone      | LUM  |              |   |
|------------|------|--------------|---|
|            | DTR  | 95% CI       | n |
| <b>803</b> | 3.8  | 2.8 -- 4.8   | 5 |
| <b>GB4</b> | 17.0 | 15.0 -- 16.6 | 5 |
| 11C2       | 19.2 | 16.7 -- 21.7 | 5 |
| 24G11      | 14.0 | 2.0 -- 13.8  | 5 |
| 36D5       | 10.3 | 6.4 -- 11.3  | 3 |
| 36E5       | 8.0  | 1.1 -- 13.9  | 4 |
| 36F11      | 15.8 | 12.5 -- 17.5 | 4 |
| 36H9       | 7.0  | 4.2 -- 7.1   | 2 |
| 37D9       | 14.0 | 11.4 -- 16.6 | 4 |
| 38G5       | 5.7  | 3.5 -- 7.6   | 3 |
| 39C3       | 18.3 | 15.5 -- 21.0 | 4 |
| 39C5       | 5.5  | 2.4 -- 7.1   | 4 |
| 39H5       | 8.8  | 6.9 -- 9.8   | 6 |
| 40E7       | 7.5  | 0.2 -- 12.9  | 2 |
| 43A6       | 14.0 | 10.3 -- 17.7 | 4 |
| 43E5       | 4.8  | 2.3 -- 6.3   | 4 |
| 44D4       | 19.0 | 16.5 -- 21.5 | 3 |
| 44F6       | 14.0 | 10.6 -- 17.4 | 4 |
| 46G9       | 21.3 | 16.2 -- 26.5 | 3 |
| 48C1       | 18.0 | 13.7 -- 22.3 | 3 |
| 61D3       | 12.4 | 8.9 -- 11.8  | 5 |
| 76H10      | 15.0 | 11.4 -- 16.6 | 3 |
| 85G7       | 4.3  | 16.1 -- 17.9 | 4 |
| 87E7       | 8.3  | 5.1 -- 10.9  | 3 |

**Table S3.** List of 117 predicted genes within a ~500 kb region of the *Plasmodium falciparum* chromosome 5 region linked to EC<sub>50</sub> and DTR measures of lumefantrine (LUM) response. The *pfmdr1* gene, located near the maximal LOD at 966,290 is indicated in bold font. The locations and descriptions of the genes are from PlasmoDB.

| [Gene ID]     | [Genomic Location] | [Product Description]                                          |
|---------------|--------------------|----------------------------------------------------------------|
| PF3D7_0516800 | 700,120 - 707,256  | AP2 domain transcription factor AP2-O2, putative               |
| PF3D7_0516900 | 712,762 - 713,772  | 60S ribosomal protein L2                                       |
| PF3D7_0517000 | 715,765 - 716,675  | 60S ribosomal protein L12, putative                            |
| PF3D7_0517100 | 718,425 - 719,855  | conserved protein, unknown function                            |
| PF3D7_0517200 | 720,743 - 722,641  | conserved Plasmodium protein, unknown function                 |
| PF3D7_0517300 | 724,681 - 725,751  | serine/arginine-rich splicing factor 1                         |
| PF3D7_0517400 | 731,407 - 735,162  | FACT complex subunit SPT16, putative                           |
| PF3D7_0517500 | 735,887 - 738,400  | UTP--glucose-1-phosphate uridylyltransferase, putative         |
| PF3D7_0517600 | 740,156 - 741,034  | F-actin-capping protein subunit beta, putative                 |
| PF3D7_0517700 | 743,179 - 745,329  | eukaryotic translation initiation factor 3 subunit B, putative |
| PF3D7_0517800 | 745,798 - 746,634  | apicortin, putative                                            |
| PF3D7_0517900 | 747,795 - 749,677  | zinc finger protein, putative                                  |
| PF3D7_0518000 | 750,661 - 752,435  | NOSIP domain-containing protein, putative                      |
| PF3D7_0518100 | 753,298 - 757,544  | protein AMR2                                                   |
| PF3D7_0518200 | 758,503 - 758,898  | SWIB/MDM2 domain-containing protein                            |
| PF3D7_0518300 | 759,831 - 760,998  | proteasome subunit beta type-1, putative                       |
| PF3D7_0518400 | 762,103 - 762,792  | cyclin, putative                                               |
| PF3D7_0518500 | 763,532 - 766,903  | ATP-dependent RNA helicase DDX23, putative                     |
| PF3D7_0518600 | 769,310 - 773,140  | WD repeat-containing protein 26, putative                      |
| PF3D7_0518700 | 774,075 - 780,438  | mRNA-binding protein PUF1                                      |
| PF3D7_0518800 | 783,638 - 784,991  | secreted ookinete protein, putative                            |
| PF3D7_0518900 | 785,664 - 786,565  | conserved protein, unknown function                            |
| PF3D7_0519000 | 788,599 - 789,480  | histone RNA hairpin-binding protein, putative                  |
| PF3D7_0519100 | 790,399 - 790,773  | 50S ribosomal protein L14, mitochondrial, putative             |
| PF3D7_0519200 | 791,719 - 792,936  | V-type proton ATPase 16 kDa proteolipid subunit                |
| PF3D7_0519300 | 795,527 - 797,473  | protoheme IX farnesyltransferase, putative                     |

|               |                   |                                                                  |
|---------------|-------------------|------------------------------------------------------------------|
| PF3D7_0519400 | 798,036 - 798,775 | 40S ribosomal protein S24                                        |
| PF3D7_0519500 | 801,450 - 809,127 | CCR4 domain-containing protein 1, putative                       |
| PF3D7_0519600 | 812,648 - 814,915 | zinc finger protein, putative                                    |
| PF3D7_0519700 | 817,066 - 819,139 | FoP domain-containing protein, putative                          |
| PF3D7_0519800 | 820,719 - 822,908 | EELM2 domain-containing protein, putative                        |
| PF3D7_0519900 | 825,835 - 827,412 | conserved protein, unknown function                              |
| PF3D7_0520000 | 828,953 - 829,883 | 40S ribosomal protein S9, putative                               |
| PF3D7_0520100 | 831,617 - 834,343 | protein phosphatase PPM9, putative                               |
| PF3D7_0520200 | 835,314 - 837,407 | mediator of RNA polymerase II transcription subunit 17, putative |
| PF3D7_0520300 | 838,428 - 839,083 | U6 snRNA-associated Sm-like protein LSm2, putative               |
| PF3D7_0520400 | 839,655 - 840,560 | single-stranded DNA-binding protein, putative                    |
| PF3D7_0520500 | 841,723 - 842,655 | phosphomethylpyrimidine kinase, putative                         |
| PF3D7_0520600 | 843,586 - 844,817 | bis(5'-nucleosyl)-tetraphosphatase [asymmetrical]                |
| PF3D7_0520700 | 845,843 - 848,767 | CDC73 domain-containing protein, putative                        |
| PF3D7_0520800 | 849,862 - 856,026 | conserved protein, unknown function                              |
| PF3D7_0520900 | 857,038 - 858,477 | Adenosylhomocysteinase                                           |
| PF3D7_0521000 | 859,373 - 861,063 | conserved Plasmodium protein, unknown function                   |
| PF3D7_0521100 | 861,930 - 867,583 | conserved Plasmodium protein, unknown function                   |
| PF3D7_0521200 | 868,892 - 869,878 | conserved protein, unknown function                              |
| PF3D7_0521300 | 870,184 - 874,570 | zinc finger protein, putative                                    |
| PF3D7_0521400 | 875,873 - 877,561 | conserved protein, unknown function                              |
| PF3D7_0521500 | 878,068 - 879,762 | ribosomal large subunit pseudouridylate synthase, putative       |
| PF3D7_0521600 | 880,065 - 880,355 | conserved Plasmodium protein, unknown function                   |
| PF3D7_0521700 | 882,376 - 884,901 | ATP-dependent RNA helicase DDX1, putative                        |
| PF3D7_0521800 | 885,714 - 888,232 | AFG1-like ATPase, putative                                       |
| PF3D7_0521900 | 888,657 - 895,144 | conserved Plasmodium protein, unknown function                   |
| PF3D7_0522000 | 896,018 - 896,940 | conserved Plasmodium protein, unknown function                   |
| PF3D7_0522100 | 897,465 - 899,756 | conserved Plasmodium protein, unknown function                   |
| PF3D7_0522200 | 901,414 - 902,173 | transcription initiation factor TFIID subunit 10, putative       |
| PF3D7_0522300 | 902,613 - 904,844 | 18S rRNA (guanine-N(7))-methyltransferase, putative              |
| PF3D7_0522400 | 907,837 - 936,315 | conserved Plasmodium protein, unknown function                   |

|                      |                          |                                                                   |
|----------------------|--------------------------|-------------------------------------------------------------------|
| PF3D7_0522500        | 937,231 - 938,037        | 50S ribosomal protein L17, apicoplast, putative                   |
| PF3D7_0522600        | 940,249 - 941,700        | inner membrane complex protein                                    |
| PF3D7_0522700        | 942,767 - 943,873        | iron-sulfur assembly protein                                      |
| PF3D7_0522800        | 944,184 - 944,931        | pre-mRNA-splicing factor BUD31, putative                          |
| PF3D7_0522900        | 948,951 - 953,609        | zinc finger protein, putative                                     |
| <b>PF3D7_0523000</b> | <b>957,890 - 962,149</b> | <b>multidrug resistance protein 1</b>                             |
| PF3D7_0523100        | 963,227 - 965,044        | mitochondrial-processing peptidase subunit alpha, putative        |
| PF3D7_0523200        | 966,123 - 969,737        | heptatricopeptide repeat-containing protein, putative             |
| PF3D7_0523300        | 970,266 - 970,962        | cytochrome c oxidase subunit ApiCOX18, putative                   |
| PF3D7_0523400        | 973,518 - 975,876        | DnaJ protein, putative                                            |
| PF3D7_0523500        | 976,690 - 977,815        | dynein light chain Tctex-type, putative                           |
| PF3D7_0523600        | 978,665 - 979,870        | conserved protein, unknown function                               |
| PF3D7_0523700        | 980,754 - 985,354        | conserved Plasmodium membrane protein, unknown function           |
| PF3D7_0523800        | 990,005 - 992,059        | divalent metal transporter, putative                              |
| PF3D7_0523900        | 993,433 - 994,607        | MerC domain-containing protein, putative                          |
| PF3D7_0524000        | 998,753 - 1,002,124      | karyopherin beta                                                  |
| PF3D7_0524100        | 1,004,237 - 1,008,108    | conserved Plasmodium protein, unknown function                    |
| PF3D7_0524200        | 1,008,636 - 1,009,404    | conserved Plasmodium membrane protein, unknown function           |
| PF3D7_0524300        | 1,010,951 - 1,012,171    | conserved Plasmodium protein, unknown function                    |
| PF3D7_0524400        | 1,013,453 - 1,014,550    | ribosome-interacting GTPase 1, putative                           |
| PF3D7_0524500        | 1,016,198 - 1,016,569    | conserved Plasmodium protein, unknown function                    |
| PF3D7_0524600        | 1,017,809 - 1,018,582    | 50S ribosomal protein L12, apicoplast, putative                   |
| PF3D7_0524700        | 1,019,585 - 1,019,902    | mitochondrial import receptor subunit TOM22, putative             |
| PF3D7_0524800        | 1,021,408 - 1,024,307    | ubiquitin fusion degradation protein 1, putative                  |
| PF3D7_0524900        | 1,027,396 - 1,030,362    | S-adenosyl-L-methionine-dependent tRNA 4-demethylwyosine synthase |
| PF3D7_0525000        | 1,036,229 - 1,038,343    | zinc finger protein, putative                                     |
| PF3D7_0525100        | 1,041,745 - 1,043,766    | acyl-CoA synthetase                                               |
| PF3D7_0525200        | 1,045,462 - 1,051,253    | structural maintenance of chromosomes protein 6, putative         |
| PF3D7_0525300        | 1,052,468 - 1,053,913    | conserved protein, unknown function                               |
| PF3D7_0525400        | 1,057,651 - 1,059,054    | 7-helix-1 protein                                                 |
| PF3D7_0525500        | 1,059,918 - 1,065,509    | WD repeat-containing protein, putative                            |

|               |                       |                                                                |
|---------------|-----------------------|----------------------------------------------------------------|
| PF3D7_0525600 | 1,066,526 - 1,067,712 | RNA methyltransferase, putative                                |
| PF3D7_0525700 | 1,068,516 - 1,069,285 | conserved protein, unknown function                            |
| PF3D7_0525800 | 1,071,247 - 1,072,149 | inner membrane complex protein 1g, putative                    |
| PF3D7_0525900 | 1,073,646 - 1,075,644 | NIMA related kinase 2                                          |
| PF3D7_0526000 | 1,075,913 - 1,078,333 | RAP protein, putative                                          |
| PF3D7_0526100 | 1,079,779 - 1,081,008 | conserved Plasmodium membrane protein, unknown function        |
| PF3D7_0526200 | 1,081,558 - 1,083,816 | ADP-ribosylation factor GTPase-activating protein, putative    |
| PF3D7_0526200 | 1,081,558 - 1,083,816 | ADP-ribosylation factor GTPase-activating protein, putative    |
| PF3D7_0526300 | 1,085,623 - 1,086,594 | WD repeat-containing protein 55, putative                      |
| PF3D7_0526400 | 1,088,423 - 1,089,508 | conserved Plasmodium protein, unknown function                 |
| PF3D7_0526500 | 1,090,930 - 1,095,084 | conserved Plasmodium protein, unknown function                 |
| PF3D7_0526600 | 1,101,203 - 1,114,777 | conserved Plasmodium protein, unknown function                 |
| PF3D7_0526700 | 1,117,261 - 1,119,651 | conserved protein, unknown function                            |
| PF3D7_0526800 | 1,120,704 - 1,121,810 | conserved Plasmodium protein, unknown function                 |
| PF3D7_0526900 | 1,123,610 - 1,124,595 | transmembrane emp24 domain-containing protein, putative        |
| PF3D7_0527000 | 1,125,099 - 1,128,146 | DNA replication licensing factor MCM3, putative                |
| PF3D7_0527100 | 1,129,959 - 1,130,754 | ubiquitin-conjugating enzyme E2 N, putative                    |
| PF3D7_0527200 | 1,132,937 - 1,134,854 | ubiquitin carboxyl-terminal hydrolase 14                       |
| PF3D7_0527300 | 1,135,976 - 1,137,870 | methionine aminopeptidase 1a, putative                         |
| PF3D7_0527400 | 1,140,627 - 1,141,154 | conserved Plasmodium protein, unknown function                 |
| PF3D7_0527500 | 1,143,618 - 1,145,359 | Hsc70-interacting protein                                      |
| PF3D7_0527600 | 1,145,857 - 1,148,810 | conserved Plasmodium protein, unknown function                 |
| PF3D7_0527700 | 1,150,234 - 1,150,306 | tRNA Glutamic acid                                             |
| PF3D7_0527800 | 1,151,227 - 1,151,309 | tRNA Leucine                                                   |
| PF3D7_0527900 | 1,153,676 - 1,155,673 | ATP-dependent RNA helicase DDX41, putative                     |
| PF3D7_0528000 | 1,156,205 - 1,156,579 | proteasome maturation factor UMP1, putative                    |
| PF3D7_0528100 | 1,157,840 - 1,161,553 | AP-1 complex subunit beta, putative                            |
| PF3D7_0528200 | 1,163,408 - 1,165,072 | eukaryotic translation initiation factor 3 subunit E, putative |
| PF3D7_0528300 | 1,166,520 - 1,168,010 | conserved protein, unknown function                            |

**Table S4.** Results of *pfmdr1* copy number analysis\* of *Plasmodium falciparum* lines 3D7, Dd2, 76H10, GB4 and 803.

| Clone         | Ct-FAM | Ct-Cy5 | dCt   | IndivCopy | Spread | dCT   | Max CT | Mean CTs | Comment     | OVERALL MEAN | Calibrator 1<br>Copy No. | Calibrator 2<br>Copy No. | Calibrator 3<br>Copy No. |
|---------------|--------|--------|-------|-----------|--------|-------|--------|----------|-------------|--------------|--------------------------|--------------------------|--------------------------|
| 3D7 3/1/2013  | 31.99  | 31.37  | 0.62  | 0.42      | 0.18   | 32.04 | 31.64  | Ok       | <b>0.79</b> | 1.00         | 0.40                     | 0.98                     |                          |
|               | 32.04  | 31.39  | 0.65  | 0.41      |        |       |        |          |             |              |                          |                          |                          |
|               | 31.93  | 31.13  | 0.8   | 0.37      |        |       |        |          |             |              |                          |                          |                          |
| DD2 3/1/2013  | 30.68  | 31.34  | -0.66 | 2.55      | 0.16   | 31.34 | 30.93  | Ok       | <b>1.99</b> | 2.50         | 1.00                     | 2.46                     |                          |
|               | 30.54  | 31.24  | -0.7  | 2.62      |        |       |        |          |             |              |                          |                          |                          |
|               | 30.63  | 31.17  | -0.54 | 2.35      |        |       |        |          |             |              |                          |                          |                          |
| 76H10         | 29.86  | 29.23  | 0.63  | 1.04      | 0.11   | 30.37 | 29.86  | Ok       | <b>0.81</b> | 1.02         | 0.41                     | 1.00                     |                          |
|               | 30.36  | 29.73  | 0.63  | 1.04      |        |       |        |          |             |              |                          |                          |                          |
|               | 30.37  | 29.63  | 0.74  | 0.97      |        |       |        |          |             |              |                          |                          |                          |
| GB4           | 30.39  | 29.68  | 0.71  | 0.99      | 0.03   | 30.39 | 29.94  | Ok       | <b>0.79</b> | 0.99         | 0.40                     | 0.98                     |                          |
|               | 30.23  | 29.52  | 0.71  | 0.99      |        |       |        |          |             |              |                          |                          |                          |
|               | 30.24  | 29.56  | 0.68  | 1.01      |        |       |        |          |             |              |                          |                          |                          |
| CP803 control | 31.73  | 31.05  | 0.68  | 1.01      | 0.30   | 34.16 | 32.72  | Ok       | <b>0.73</b> | 0.92         | 0.37                     | 0.90                     |                          |
|               | 33.5   | 32.72  | 0.78  | 0.94      |        |       |        |          |             |              |                          |                          |                          |
|               | 34.16  | 33.18  | 0.98  | 0.82      |        |       |        |          |             |              |                          |                          |                          |
| CP803 60nM    | 29.99  | 29.3   | 0.69  | 1.00      | 0.04   | 30.15 | 29.67  | Ok       | <b>0.79</b> | 0.99         | 0.40                     | 0.97                     |                          |
|               | 29.93  | 29.2   | 0.73  | 0.97      |        |       |        |          |             |              |                          |                          |                          |
|               | 30.15  | 29.45  | 0.7   | 0.99      |        |       |        |          |             |              |                          |                          |                          |

\* Copy number determinations were performed using the using the oligonucleotide primers and methods of Price *et al.* (2004, Mefloquine resistance in *Plasmodium falciparum* and increased *pfmdr1* gene copy number. *Lancet* 364, 438-447).
