# Supplementary material for: Evidence for linkage of pfmdr1, pfcrt, and pfk13 polymorphisms to lumefantrine and mefloquine susceptibilities in a Plasmodium falciparum cross
Source: PubMed Central journal article supplement — Int J Parasitol Drugs Drug Resist. 2020 Oct 27;14:208–17. doi: 10.1016/j.ijpddr.2020.10.009 (PMC7677662; doi:10.1016/j.ijpddr.2020.10.009), 2020-10-27
Supplement: mmc2.pdf [file mmc2.pdf]

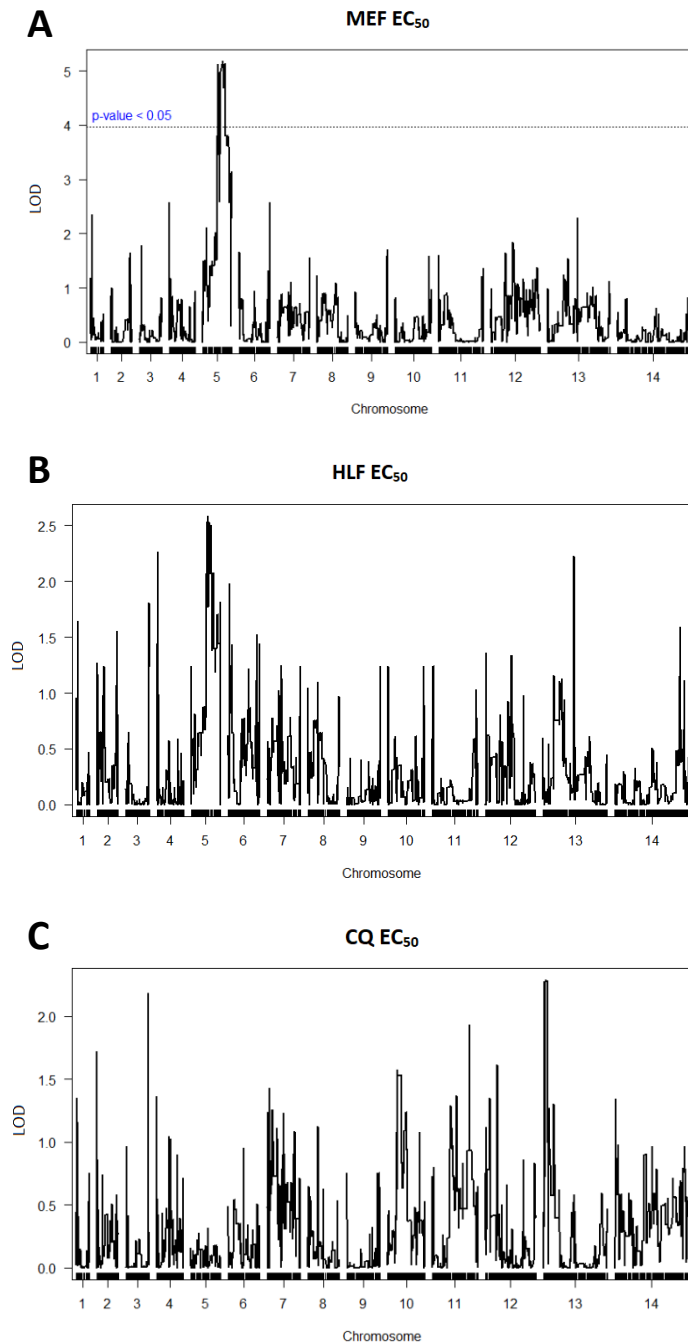

**Fig. S1. QTL analysis of mefloquine (MEF), halofantrine (HLF), and chloroquine (CQ) phenotypes in the 803×GB4 cross.** **A** The QTL plot from MEF EC<sub>50</sub> determinations. Maximal LOD score is at location 966,290 on Chromosome 5 ( $p < 0.005$ ). **B** QTL plot from HLF EC<sub>50</sub> determinations. Maximal LOD score is at location 966,290 on Chromosome 5 without statistical significance. **C** QTL plot from CQ EC<sub>50</sub> determinations. Maximal LOD score is at location 82,492 on Chromosome 13 without statistical significance.
